# Supplementary material
Source: Springer Nature journal article supplement (https://www.springermedizin.de/resource/supplementary/12865_2008_259_MOESM6_ESM.pdf/9427620)

**A**

|                        |    |    |   |   |    |    |
|------------------------|----|----|---|---|----|----|
| CAPE ( $\mu\text{M}$ ) | 0  | 10 | 0 | 5 | 10 | 20 |
| LPS (100 ng/mL)        | -- | -- | + | + | +  | +  |

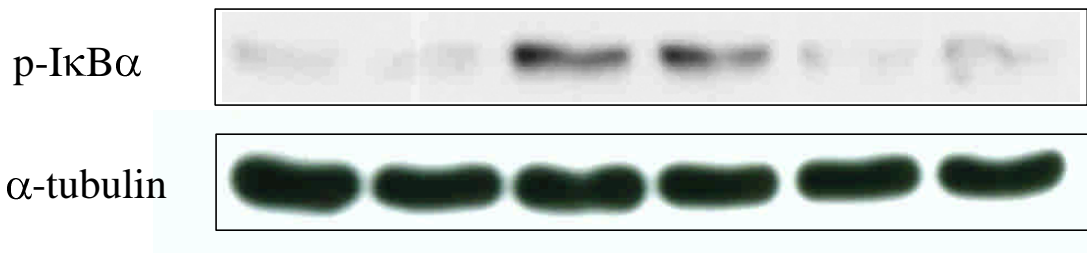

**B**

|                        |    |    |   |   |    |    |                                     |             |
|------------------------|----|----|---|---|----|----|-------------------------------------|-------------|
| CAPE ( $\mu\text{M}$ ) | 0  | 10 | 0 | 5 | 10 | 20 | 0                                   | 0           |
| LPS (100 ng/mL)        | -- | -- | + | + | +  | +  | +                                   | +           |
|                        |    |    |   |   |    |    | 100X unlabeled NF- $\kappa\text{B}$ | 100X mutant |

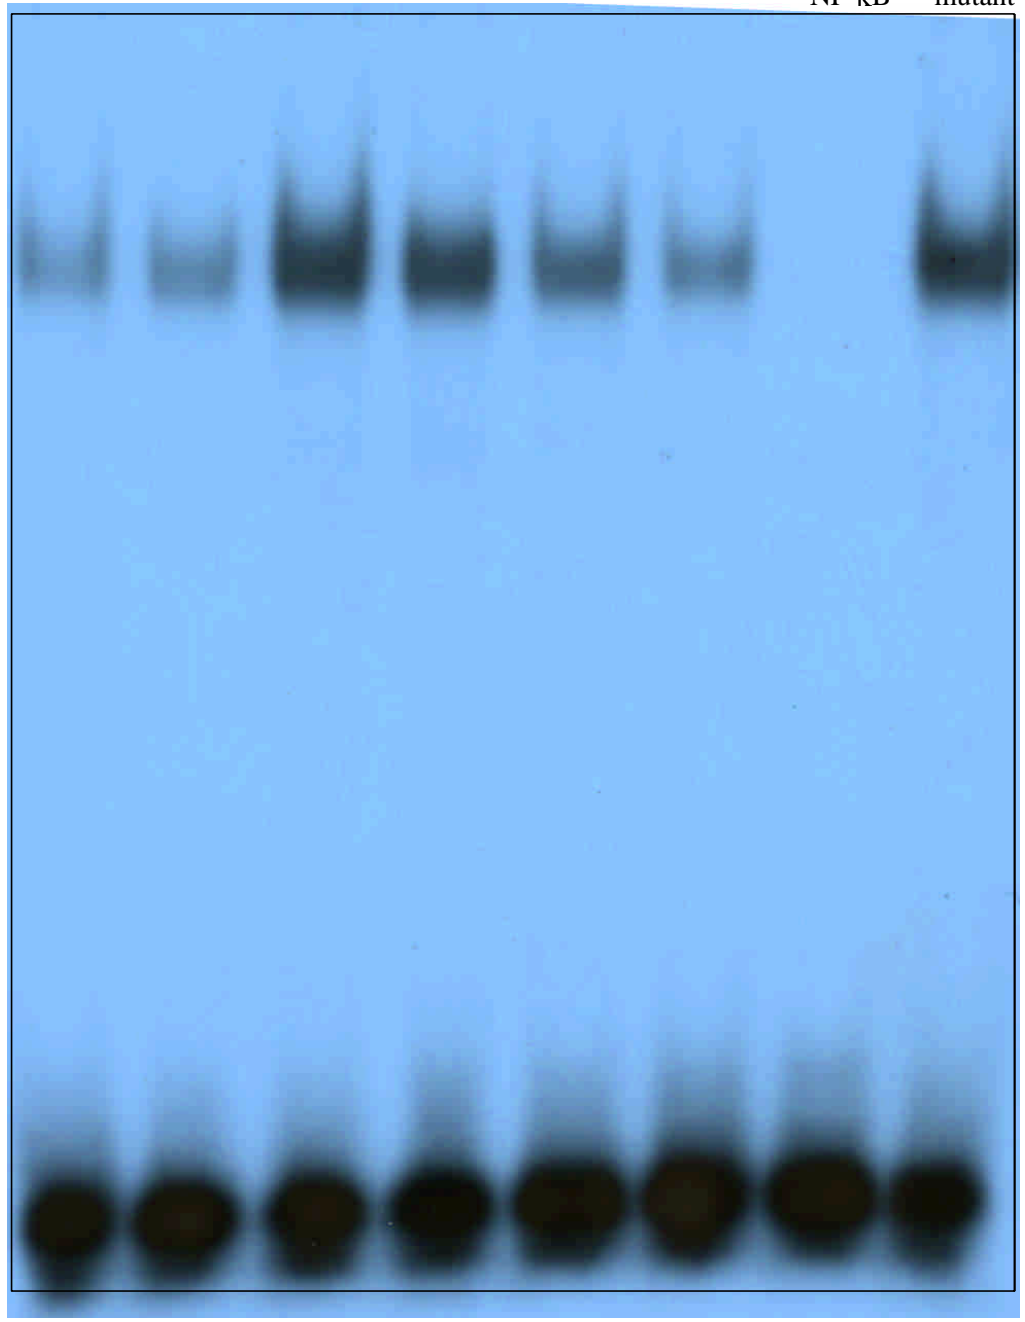

**C**

|                        |    |    |   |   |    |    |
|------------------------|----|----|---|---|----|----|
| CAPE ( $\mu\text{M}$ ) | 0  | 10 | 0 | 5 | 10 | 20 |
| LPS (100 ng/mL)        | -- | -- | + | + | +  | +  |

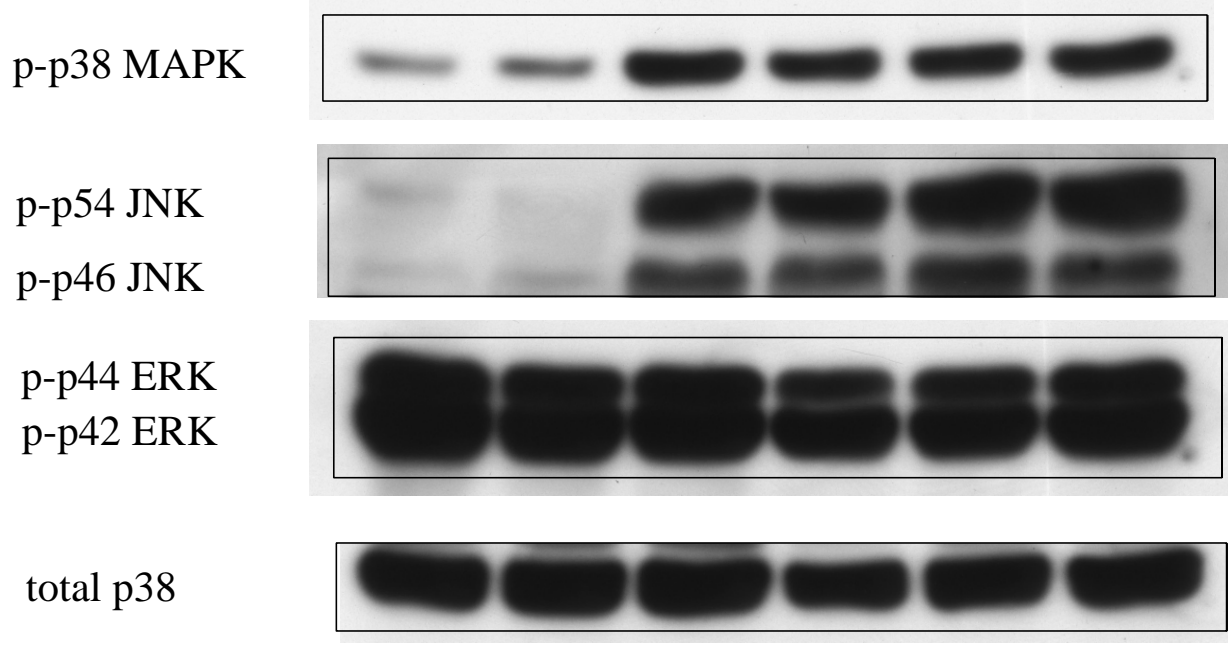

Supplement: MOESM6 [file 9427620]
